# Supplementary material for: Docetaxel-induced cognitive impairment in rats can be ameliorated by edaravone dexborneol: Evidence from the indicators of biological behavior and anisotropic fraction
Source: Front Neurosci. 2023 Apr 3;17:1167425. doi: 10.3389/fnins.2023.1167425 (PMC10106566; doi:10.3389/fnins.2023.1167425)
Supplement: Supplementary file 1 [file Table_1.XLSX]

## Sheet: 1-5d
	1d	2d	3d	4d	5d
Control-1	31.5	24.9	15.2	18.7	17.9
2	31.5	30.7	40.2	17.8	13.5
3	57.8	37.5	25.9	10.7	17.2
4	38.2	42.8	29.7	12.7	13.3
5	28.3	28.2	19.8	11.9	6.9
6	42.2	33	35.7	22.5	17.8
7	26.6	20.4	17.3	10.1	20.1
8	31.2	26.5	17.5	20	16.9
H-DTX-1	47.9	25.1	15.7	31.2	27.7
2	26.6	24.2	25.3	6.4	7.9
3	39.4	41.3	51.3	13.1	17.9
4	43.9	20	37.5	35.7	14.6
5	34.1	24.7	17.3	24	39.4
6	60	59.6	60	17.4	24.6
7	42.7	27.2	30.3	40.2	19
8	53.4	60	26.6	38.7	41.1
L-DTX-1	51.7	60	24.1	20.3	35
2	34.2	34.7	47.2	17.2	18.3
3	40.5	17.2	14.7	18.2	19.6
4	27.9	6.6	10.2	9.4	14.6
5	28.5	14.5	18.4	27.4	11.8
6	40.8	14.3	18.7	25.6	18.4
7	32.8	26.9	28.4	23.9	10.8
8	55	60	46.6	47.4	27.6

## Sheet: 6d
Groups	Duration	Distance	Mean speed	2 : entries	2 : time	Time in target quadrant（%）		Number of platform crossing（count）
Control -1	60	11.851	0.198	13	30.2	0.503333	50.3333	7
2	60	8.659	0.144	10	24.8	0.413333	41.3333	3
3	60	4.52	0.075	5	23.7	0.395	39.5	3
4	60	11.419	0.19	10	33.7	0.561667	56.1667	4
5	60	11.304	0.188	7	29.2	0.486667	48.6667	2
6	60	5.401	0.09	7	14.6	0.243333	24.3333	5
7	60	12.564	0.209	8	21.4	0.356667	35.6667	3
8	60	7.898	0.132	7	35.4	0.59	59	2
H-DTX-1	60	3.77	0.063	2	8	0.133333	13.3333	1
2	60	10.155	0.169	11	25	0.416667	41.6667	6
3	60	2.949	0.049	2	15.6	0.26	26	1
4	60	7.883	0.131	4	19.2	0.32	32	0
5	60	5.479	0.091	6	36.5	0.608333	60.8333	3
6	60	5.689	0.095	0	0	0	0	0
7	60	4.939	0.082	2	9.2	0.153333	15.3333	1
8	60	2.324	0.039	1	4.7	0.0783333	7.83333	0
L-DTX-1	60	4.31	0.072	1	4.7	0.0783333	7.83333	0
2	60	10.172	0.17	10	27.4	0.456667	45.6667	3
3	60	12.168	0.203	12	33.5	0.558333	55.8333	7
4	60	3.912	0.063	4	23.4	0.39	39	3
5	60	7.73	0.129	6	15.9	0.265	26.5	2
6	60	14.19	0.237	9	17.4	0.29	29	2
7	60	5.055	0.084	4	42.3	0.705	70.5	1
8	60	3.806	0.063	1	22.5	0.375	37.5	0
