# Supplementary material for: Docetaxel-induced cognitive impairment in rats can be ameliorated by edaravone dexborneol: Evidence from the indicators of biological behavior and anisotropic fraction
Source: Front Neurosci. 2023 Apr 3;17:1167425. doi: 10.3389/fnins.2023.1167425 (PMC10106566; doi:10.3389/fnins.2023.1167425)
Supplement: Supplementary file 2 [file Table_2.XLSX]

## Sheet: 1-5d
	Rat number	1d	2d	3d	4d	5d
Control-ED	1	28.425	9.775	11.6	7.925	6.85
	2	11.35	13.2	11.425	11.225	7.85
	3	11.775	14.2	11.8	7.075	7.675
	4	10.9	13.85	11.575	7.175	8.75
Control	5	19.575	10.85	8.1	13.25	4.975
	6	8.225	6.35	7.125	8.425	10.325
	7	6.2	8.35	5.85	6.175	5.85
	8	20.525	6.275	5.575	5.35	5.175
H-DTX-ED	1	12.025	7.125	7.575	7.05	7.6
	2	8.8	6.5	6.45	5.075	6.15
	3	18.75	8.925	6.625	8.275	6.825
	4	12.125	23.45	5.875	9.025	8.025
H-DTX	5	12.45	16.65	10.25	7.625	9.775
	6	20.95	15.275	18.625	10.55	8.725
	7	20.4	6.35	7.075	6.575	10.575
	8	20.775	11.65	13.375	12.2	10.675
L-DTX-ED	1	11.7	12.125	5.05	8.925	5.675
	2	17.2	7.5	5.35	5.9	5.575
	3	9.05	8.825	7.05	7.475	7.275
	4	29.95	18.475	8.5	18.275	15.625
L-DTX	5	42.475	27.525	21.725	24.8	15.125
	6	11.05	11	12.775	6.85	10.075
	7	6.175	7.325	6.45	5.55	6.375
	8	5.875	4.975	4.775	4.6	4.625

## Sheet: 6d
Control-ED	Duration	2 : time	Time in target quadrant（%）		Number of platform crossing（count）
1	60	21.3	0.355	35.5	4
2	60	31.4	0.523333	52.3333	5
3	60	19.1	0.318333	31.8333	5
4	60	32.3	0.538333	53.8333	4
Control-5	60	36.9	0.615	61.5	5
6	60	13.4	0.223333	22.3333	1
7	60	34.3	0.571667	57.1667	6
8	60	23.6	0.393333	39.3333	4
H-DTX-ED-1	60	28.4	0.473333	47.3333	6
2	60	35.2	0.586667	58.6667	7
3	60	31.4	0.523333	52.3333	6
4	60	37.6	0.626667	62.6667	5
H-DTX-5	60	19.4	0.323333	32.3333	4
6	60	27	0.45	45	4
7	60	26.6	0.443333	44.3333	12
8	60	24.2	0.403333	40.3333	5
L-DTX-ED-1	60	17.8	0.296667	29.6667	3
2	60	37.3	0.621667	62.1667	2
3	60	28.4	0.473333	47.3333	7
4	60	36.4	0.606667	60.6667	7
L-DTX-5	60	40.3	0.671667	67.1667	5
6	60	20.2	0.336667	33.6667	6
7	60	31.2	0.52	52	6
8	60	17.6	0.293333	29.3333	1
