# Supplementary material for: Docetaxel-induced cognitive impairment in rats can be ameliorated by edaravone dexborneol: Evidence from the indicators of biological behavior and anisotropic fraction
Source: Front Neurosci. 2023 Apr 3;17:1167425. doi: 10.3389/fnins.2023.1167425 (PMC10106566; doi:10.3389/fnins.2023.1167425)
Supplement: Supplementary file 3 [file Table_3.XLSX]

## Sheet: Sheet1
	sub	L_CA1	R_CA1	L_CA2	R_CA2	L_CA3	R_CA3	L_DG	R_DG	L_Parasubiculum	R_Parasubiculum	L_Presubiculum	R_Presubiculum	L_Subiculum	R_Subiculum	L_EC	R_EC	L_LEC	R_LEC	L_MEC	R_MEC
Control	EGroup_1_	0.155982	0.159985	0.162807	0.171256	0.238828	0.248027	0.193558	0.213993	0.221129	0.204986	0.293823	0.230216	0.181134	0.187617	0.244674	0.241205	0.224861	0.228326	0.214514	0.23013
	EGroup_2_	0.256333	0.258505	0.277232	0.256752	0.335159	0.305292	0.250539	0.24884	0.222709	0.209711	0.346202	0.260135	0.265059	0.28253	0.281741	0.297422	0.245353	0.248904	0.271798	0.243645
	EGroup_3_	0.220794	0.245675	0.27347	0.263846	0.323429	0.336508	0.266406	0.279512	0.185916	0.166913	0.254729	0.228756	0.186026	0.194993	0.222837	0.221583	0.203492	0.206103	0.177116	0.213779
	EGroup_4_	0.216772	0.222663	0.207212	0.18177	0.273933	0.263377	0.216752	0.214873	0.240474	0.235597	0.27841	0.234156	0.2271	0.24505	0.24636	0.24549	0.258327	0.253382	0.257515	0.296866
H-DTX	FGroup_1_	0.199493	0.222082	0.174945	0.19137	0.247462	0.262617	0.222279	0.245127	0.225336	0.222914	0.282194	0.252147	0.210344	0.238025	0.238993	0.264252	0.252207	0.226237	0.26129	0.249784
	FGroup_2_	0.149024	0.155102	0.166616	0.154926	0.271125	0.266815	0.199259	0.21292	0.168137	0.186793	0.227154	0.205087	0.189552	0.200912	0.250293	0.241982	0.186089	0.205292	0.207673	0.264026
	FGroup_3_	0.157715	0.169664	0.168197	0.184824	0.279269	0.294026	0.208696	0.21838	0.190257	0.183191	0.25358	0.197376	0.192294	0.203479	0.253925	0.265806	0.189337	0.194566	0.231968	0.236342
	FGroup_4_	0.156016	0.146192	0.177116	0.147225	0.237526	0.229294	0.19383	0.190042	0.192384	0.194375	0.253429	0.212813	0.185317	0.187138	0.235739	0.249322	0.218114	0.197035	0.237249	0.244251
H-DTX-ED	AGroup_1_	0.174436	0.17726	0.172812	0.164496	0.261044	0.260736	0.188676	0.212381	0.263307	0.246245	0.277392	0.25519	0.219756	0.218238	0.261259	0.251983	0.246664	0.229853	0.265826	0.249768
	AGroup_2_	0.202023	0.205138	0.182403	0.185029	0.280308	0.28131	0.228541	0.226061	0.221813	0.18349	0.307677	0.241303	0.214475	0.229238	0.227433	0.245834	0.254538	0.256624	0.288845	0.262383
	AGroup_3_	0.155048	0.160949	0.195789	0.186045	0.275955	0.256328	0.202178	0.208991	0.205575	0.202497	0.288168	0.233252	0.181953	0.207794	0.263716	0.279469	0.255458	0.287256	0.255006	0.240096
	AGroup_4_	0.199473	0.200108	0.199202	0.194081	0.245477	0.257778	0.226353	0.236532	0.205925	0.267401	0.383219	0.327322	0.20937	0.249081	0.308366	0.324353	0.282448	0.257098	0.287668	0.303156
