# Supplementary material for: Docetaxel-induced cognitive impairment in rats can be ameliorated by edaravone dexborneol: Evidence from the indicators of biological behavior and anisotropic fraction
Source: Front Neurosci. 2023 Apr 3;17:1167425. doi: 10.3389/fnins.2023.1167425 (PMC10106566; doi:10.3389/fnins.2023.1167425)
Supplement: Supplementary file 4 [file Table_4.XLSX]

## Sheet: Sheet1
	sub	L_CA1	R_CA1	L_CA2	R_CA2	L_CA3	R_CA3	L_DG	R_DG	L_Parasubiculum	R_Parasubiculum	L_Presubiculum	R_Presubiculum	L_Subiculum	R_Subiculum	L_EC	R_EC	L_LEC	R_LEC	L_MEC	R_MEC
Control	CGroup_1_	0.290977	0.290956	0.247057	0.263598	0.32035	0.316287	0.290098	0.275124	0.207985	0.251763	0.259552	0.276282	0.311677	0.308916	0.287834	0.287114	0.243783	0.273382	0.280043	0.313529
	CGroup_2_	0.154053	0.16276	0.185095	0.177411	0.265992	0.26383	0.196725	0.207599	0.194121	0.182624	0.221217	0.225991	0.166595	0.183562	0.24932	0.256632	0.193317	0.203583	0.194358	0.191813
	CGroup_3_	0.212987	0.208248	0.206615	0.206623	0.26875	0.26649	0.214551	0.215551	0.222055	0.180808	0.290262	0.249197	0.241943	0.233581	0.217312	0.231481	0.200197	0.168971	0.225051	0.199257
	CGroup_4_	0.304585	0.285034	0.31754	0.309145	0.362568	0.360084	0.307736	0.285147	0.262636	0.271459	0.360595	0.333535	0.275438	0.280325	0.40237	0.40324	0.258059	0.284654	0.294302	0.265544
L-DTX	DGroup_1_	0.150252	0.154652	0.153736	0.17299	0.274066	0.285996	0.222482	0.216173	0.218963	0.187659	0.243028	0.192556	0.196848	0.22494	0.229294	0.237255	0.187929	0.179802	0.244886	0.243827
	DGroup_2_	0.171228	0.174843	0.152137	0.202875	0.231711	0.251064	0.190914	0.18575	0.193386	0.188512	0.245521	0.229964	0.187319	0.190748	0.213884	0.240081	0.178151	0.176577	0.199955	0.234356
	DGroup_3_	0.149111	0.158362	0.159385	0.159106	0.240623	0.246929	0.197534	0.202248	0.189101	0.19846	0.245835	0.197282	0.175995	0.215655	0.23013	0.257577	0.20889	0.218046	0.230674	0.246571
	DGroup_4_	0.155611	0.154567	0.156539	0.162225	0.230762	0.251554	0.202129	0.199243	0.229169	0.199626	0.306514	0.227873	0.194147	0.209792	0.236938	0.249983	0.203215	0.21843	0.273817	0.228778
L-DTX-ED	AGroup_1_	0.174436	0.17726	0.172812	0.164496	0.261044	0.260736	0.188676	0.212381	0.263307	0.246245	0.277392	0.25519	0.219756	0.218238	0.261259	0.251983	0.246664	0.229853	0.265826	0.249768
	AGroup_2_	0.202023	0.205138	0.182403	0.185029	0.280308	0.28131	0.228541	0.226061	0.221813	0.18349	0.307677	0.241303	0.214475	0.229238	0.227433	0.245834	0.254538	0.256624	0.288845	0.262383
	AGroup_3_	0.155048	0.160949	0.195789	0.186045	0.275955	0.256328	0.202178	0.208991	0.205575	0.202497	0.288168	0.233252	0.181953	0.207794	0.263716	0.279469	0.255458	0.287256	0.255006	0.240096
	AGroup_4_	0.199473	0.200108	0.199202	0.194081	0.245477	0.257778	0.226353	0.236532	0.205925	0.267401	0.383219	0.327322	0.20937	0.249081	0.308366	0.324353	0.282448	0.257098	0.287668	0.303156
